# Supplementary material for: Generation of sub-5 nm AuNPs in the special space of the loop-cluster corona of a polymer vesicle: preparation and its unique catalytic performance in the reduction of 4-nitrophenol
Source: Royal Society of Chemistry journal article supplement (doi:10.1039/d2na00893a), 2023-01-01
Supplement: d2na00893a2.pdf [file d2na00893a2.pdf]

**Supporting Information for**  
**Generation of sub-5 nm AuNPs on Special Space of Loop-cluster**  
**Coronal of Polymeric Vesicle: Preparation and Its Unique Catalytic**  
**Performance in Reduction of 4-Nitrophenol**

Wen-Li Wang, Ayaka Kanno, Amika Ishiguri and Ren-Hua Jin\*

Department of Material and Life Chemistry, Kanagawa University, 3-27-1

Rokkakubashi, Yokohama 221-8686, Japan.

E-mail: rhjin@kanagawa-u.ac.jp

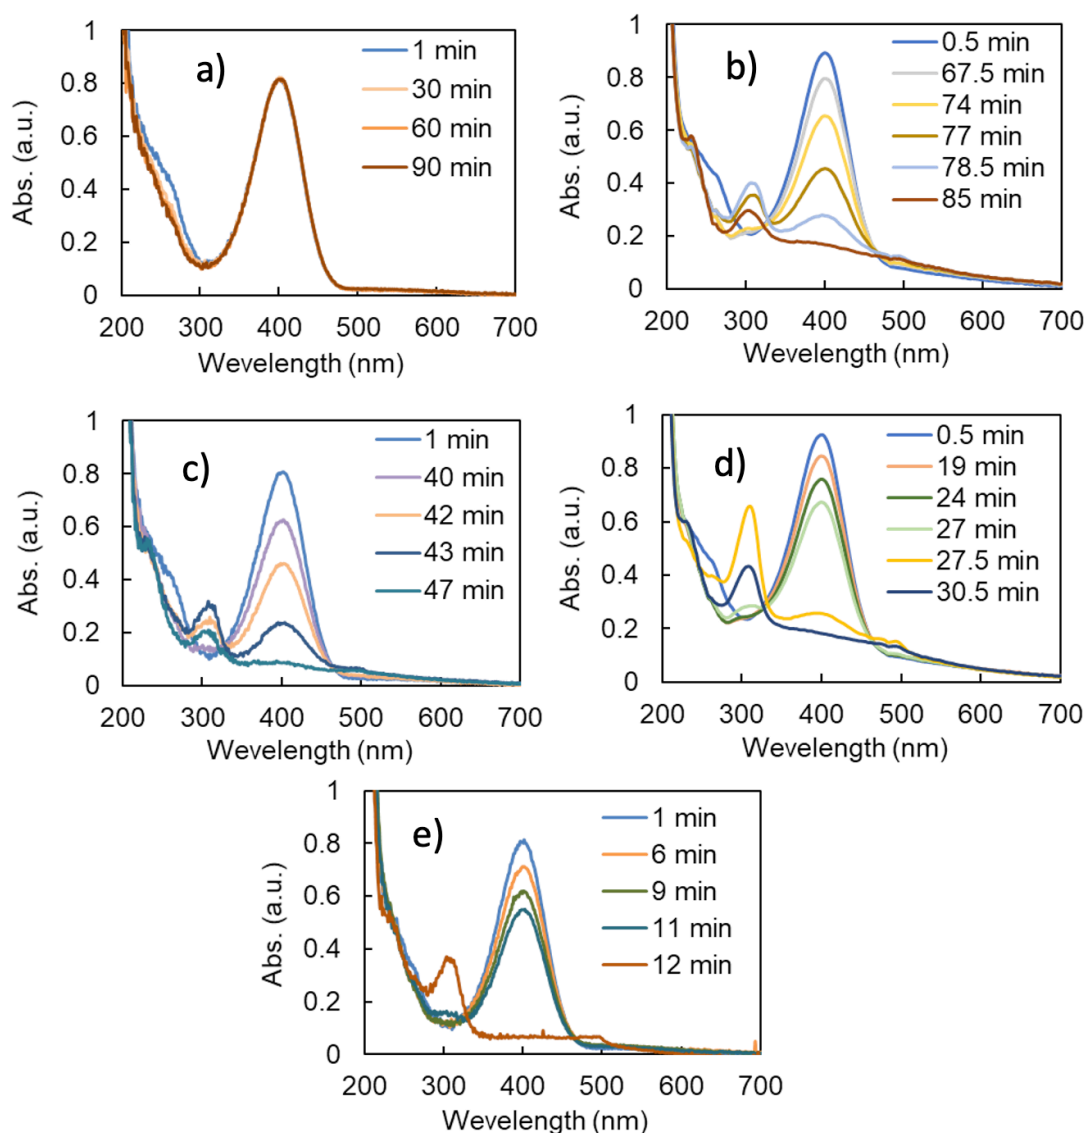

| Run | Au<br>( $\mu\text{mol}$ ) | 4-NP<br>( $\mu\text{mol}$ ) | NaBH <sub>4</sub><br>( $\mu\text{mol}$ ) | Solvent         | [Au]:[4-NP]:<br>[NaBH <sub>4</sub> ] | Induction<br>time<br>(min) |
|-----|---------------------------|-----------------------------|------------------------------------------|-----------------|--------------------------------------|----------------------------|
| a   | 0.084                     | 0.144                       | 21.1                                     | deionized water | 1 : 1.71 :252                        | No<br>reduction            |
| b   | 0.084                     | 0.144                       | 26.4                                     | deionized water | 1 : 1.71 :314                        | 57                         |
| c   | 0.084                     | 0.144                       | 42.3                                     | deionized water | 1 : 1.71 :503                        | 28                         |
| d   | 0.084                     | 0.144                       | 84.6                                     | deionized water | 1 : 1.71 :1007                       | 16                         |
| e   | 0.084                     | 0.144                       | 169.9                                    | deionized water | 1 : 1.71 :2023                       | 1                          |

**Fig. S1.** Reduction of 4-nitrophenol catalyzed by LCCV@AuNP with different concentrations of 4-NP and NaBH<sub>4</sub>, monitored by UV-vis; (a) low concentration, run **a** in table 1; (b) medium concentration, run **b** in table 1; (c) high concentration, run **c** in table 1.

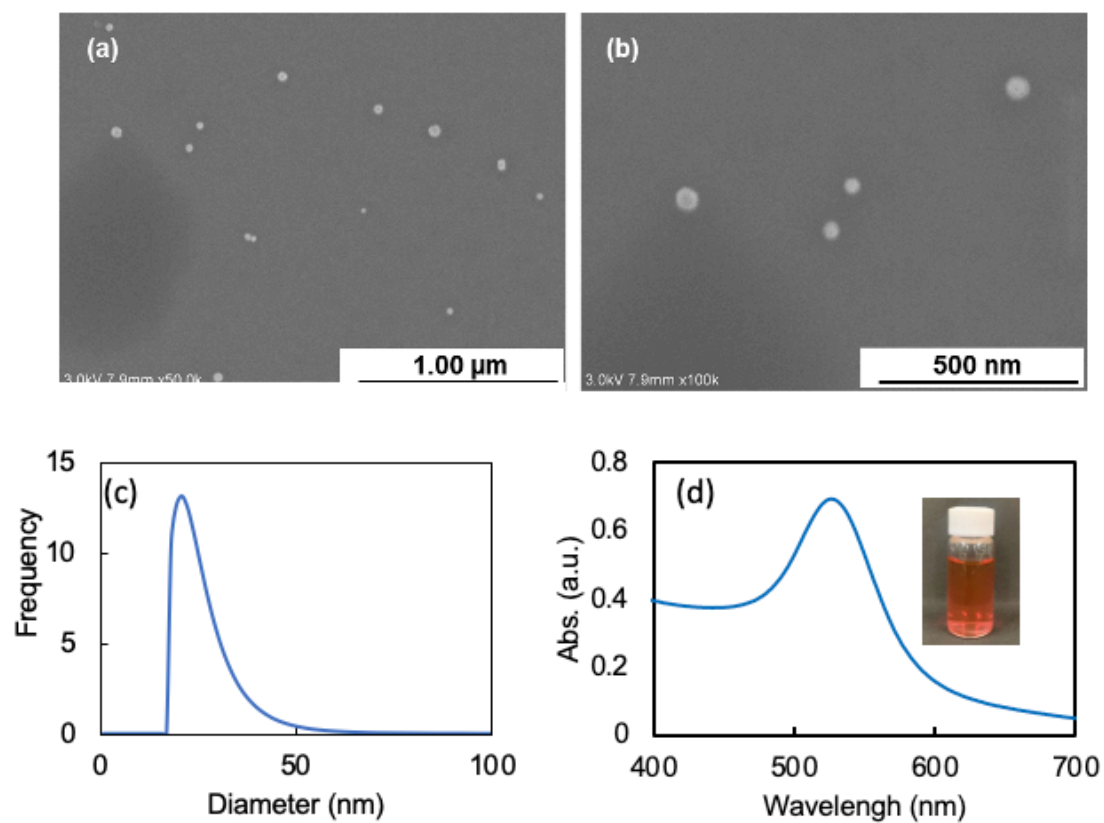

**Fig. S2.** AuNP@C obtained from the reduction of  $\text{HAuCl}_4$  by trisodium citrate. a-b) SEM images of the AuNP@C. c) DLS profile of the aqueous solution of the AuNP@C. d) UV-vis spectrum of the aqueous solution of the AuNP@C (inset: snapshot of AuNP@C in aqueous solution).

• 2-Nitrophenol

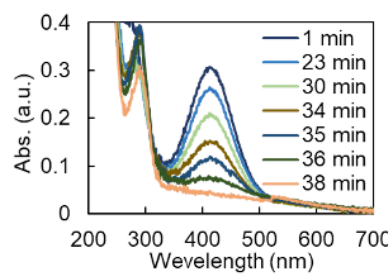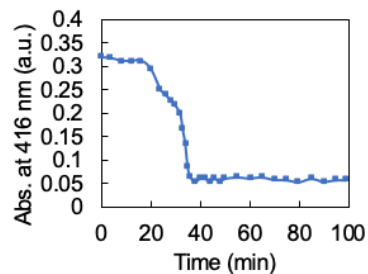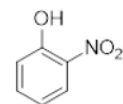

• 2-Amino-4-nitrophenol

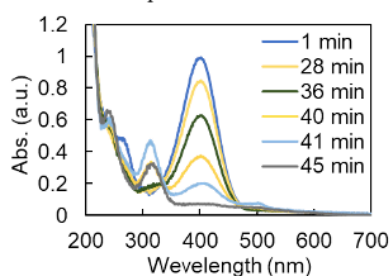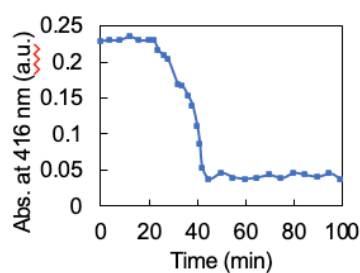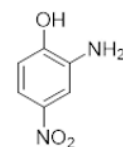

• 2-Chloro-4-nitrophenol

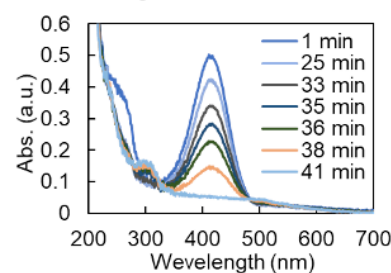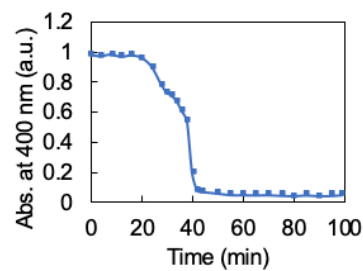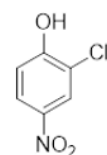

• 4-Nitro-o-cresol

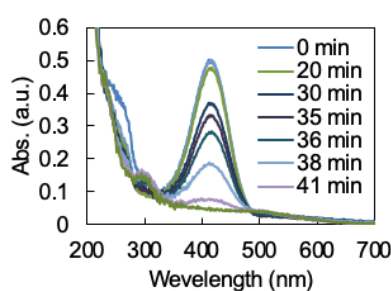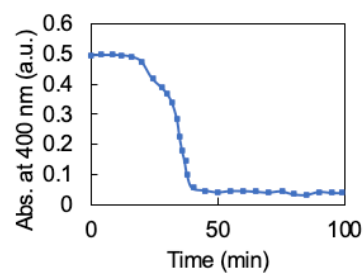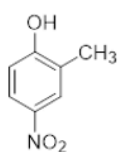

**Fig. S3** Reduction of 4-nitrophenols catalyzed by LCCV@AuNP.

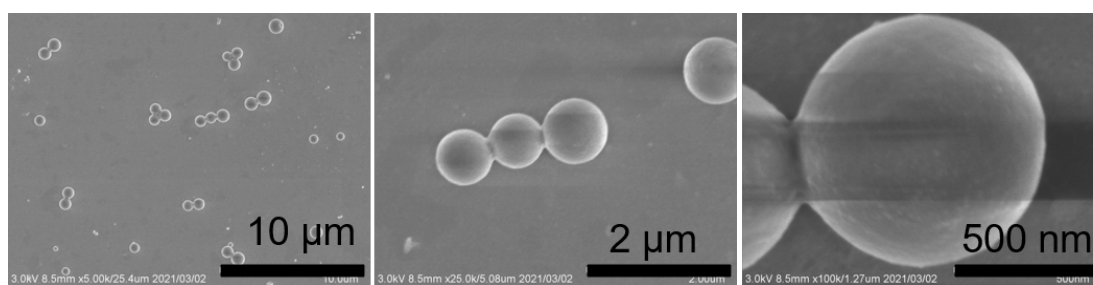

**Fig. S4** SEM images of AuNP@LCCV prepared in a high concentration of 3 mg/mL.
